# Supplementary material for: Sensing Antibiotics in Wastewater Using Surface-Enhanced Raman Scattering
Source: PubMed Central journal article supplement (PMC10061928; doi:10.1021/acs.est.3c00027), 2023-03-19

## **Sensing Antibiotics in Wastewater using Surface Enhanced Raman Scattering**

Yen-Hsiang Huang<sup>1</sup>, Hong Wei<sup>2</sup>, Peter Santiago<sup>2</sup>, William John Thrift<sup>2</sup>, Regina Ragan<sup>2</sup>, Sunny Jiang<sup>1,\*</sup>

<sup>1</sup>Department of Civil and Environmental Engineering, University of California, Irvine, Irvine, California 92697, United States

<sup>2</sup> Department of Materials Science and Engineering, University of California, Irvine, Irvine, California 92697, United States

### **Supplementary Information**

#### **Summary:**

Number of pages: 4

Number of tables: 2

Number of figures: 4

Table S1. Water quality parameters in the secondary effluent used for seeding study

| <b>Parameter</b>            | <b>Concentration</b> | <b>Description</b>     | <b>Reference</b>     |
|-----------------------------|----------------------|------------------------|----------------------|
| Aluminum (mg/L)             | 19                   | Secondary effluent     | Project No. SP-173,  |
| NH <sub>3</sub> -N (mg/L N) | 22.6                 | water quality based on | Effluent Reuse Study |
| Iron (mg/L)                 | 350                  | 2008 and 2009 annual   | GWRS Final Expansion |
| Manganese (mg/L)            | 45                   | average data.          | FINAL Implementation |
| TDS (mg/L)                  | 935                  |                        | Plan Volume 1 of 3   |
| TOC (mg/L)                  | 14                   |                        |                      |
| Turbidity (NTU)             | 3.2                  |                        |                      |
| TBOD (mg/L)                 | 11.1                 | Annual average         | FACILITIES           |
| CBOD (mg/L)                 | 6.3                  | activated sludge       | OPERATION AND        |
|                             |                      | effluent biochemical   | MAINTENANCE          |
|                             |                      | oxygen demand for      |                      |
|                             |                      | fiscal year 2004 -2005 |                      |

Table S2. The assignment of SERS bands of quinoline

| <b>Experiment (cm<sup>-1</sup>)</b> | <b>Literature (cm<sup>-1</sup>)</b> | <b>Vibrational assignment</b> |
|-------------------------------------|-------------------------------------|-------------------------------|
| 770                                 | 760                                 | ring deformation              |
| 1019                                | 1014                                | ring breathing                |
| 1030                                | 1034                                | ring breathing                |
| 1057                                | -                                   | CH bending                    |
| 1133                                | -                                   | CH bending                    |
| 1264                                | -                                   | CNC bending                   |
| 1314                                | -                                   | CH bending                    |
| 1376                                | 1372                                | CCC stretching                |
| 1391                                | 1392                                | CCC stretching                |
| 1440                                | 1433                                | CH rocking                    |
| 1463                                | -                                   | CH rocking                    |
| 1579                                | 1571                                | CCC stretching                |

Figure S1. Comparison of SERS detection of quinoline in DI water with the quantification results by UPLC-MS/MS.

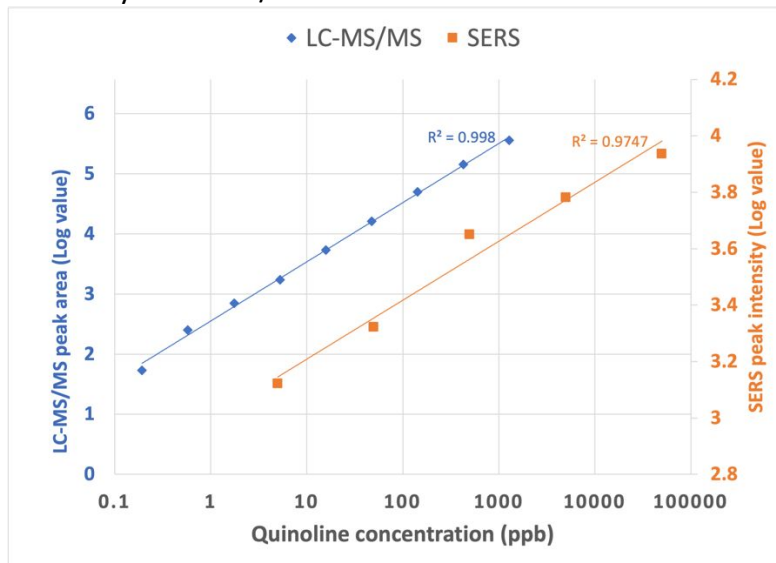

Figure S2. PCA plot of SERS spectra of DI water, treated wastewater, 50 ppm quinoline spiked in DI water or in treated wastewater. (a) Data collected on Self-Assembled SERS substrate; (b) Data collected on SEStrate.

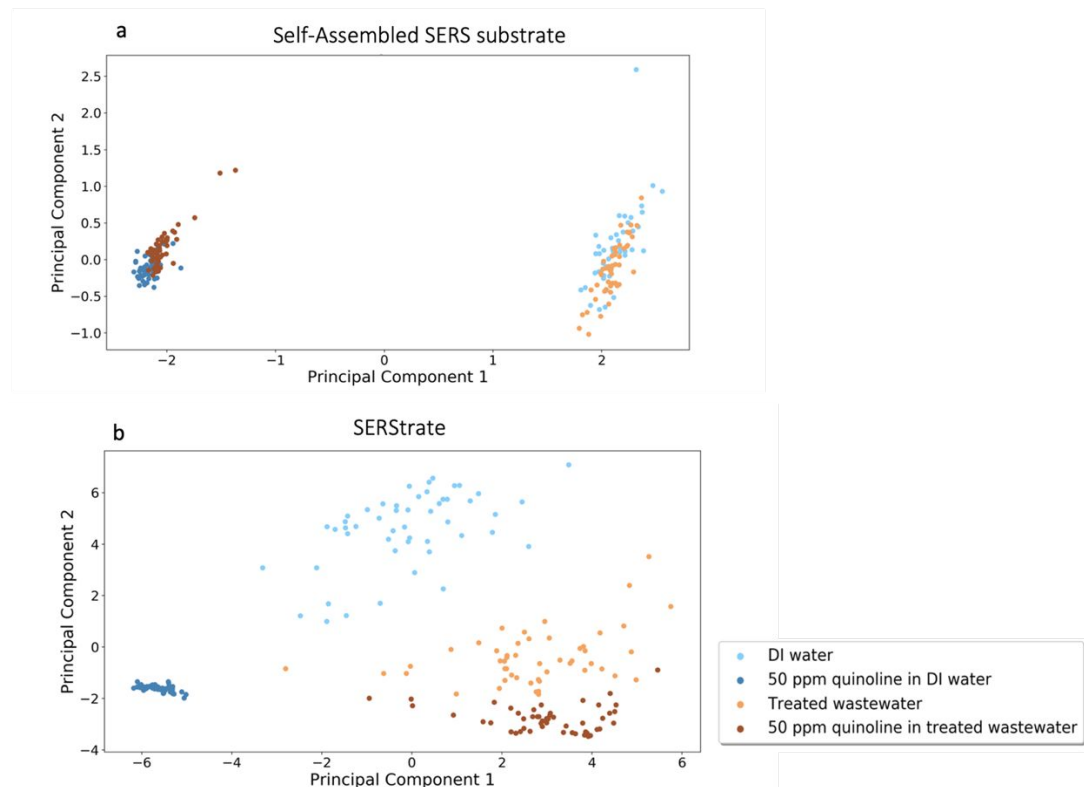

Figure S3. SERS spectra collected using Self-assembly SERS substrate for erythromycin, humic acid, Microcystin-LR, glycine, L-arginine and quinoline spiked DI water in the concentration of 5 ppm.

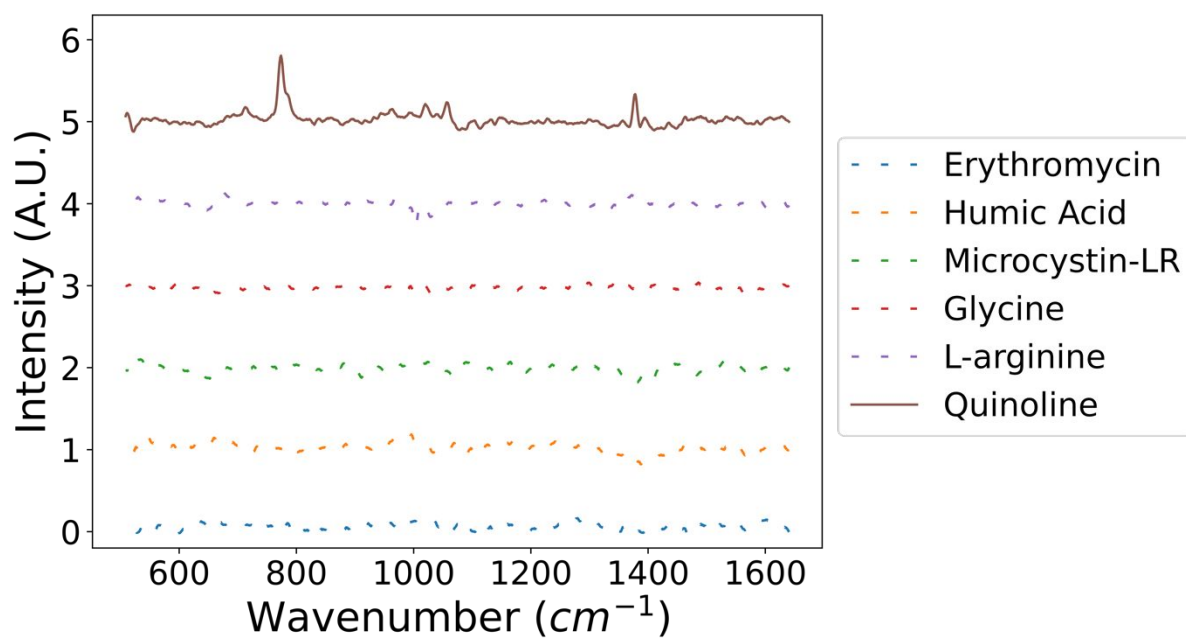

Figure S4. Microscopy image of (a) fresh Self-Assembly SERS substrate and (b) washed Self-Assembly SERS substrate.

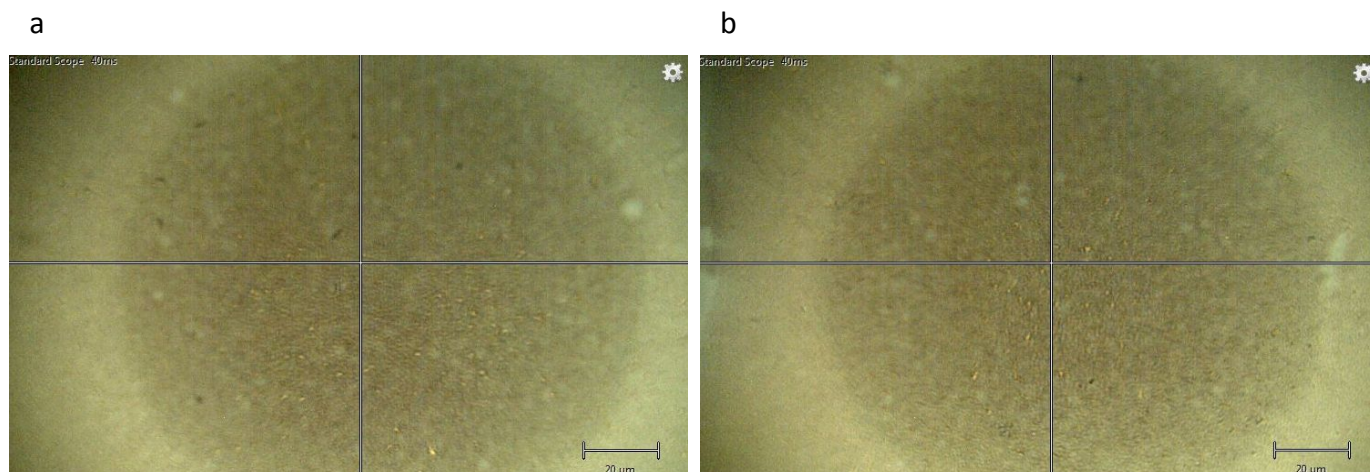

Supplement: es3c00027_si_001.pdf [file es3c00027_si_001.pdf]
